# Supplementary material for: Nudging to prevent the purchase of incompatible digital products online: An experimental study
Source: PubMed Central journal article supplement (PMC5345791; doi:10.1371/journal.pone.0173333), 2017-03-10
Supplement: pone.0173333.s002.pdf [file pone.0173333.s002.pdf]



The best movies ⏸

Explore our available movies on streaming.

← 1 →

Categories →

- Movies
- Games

Contact information →



**Lineex Shop**  
10 South Molton Street,  
London, W1K 5QH  
United Kingdom  
+44 020 7499 8002  
info@lineexshop.co.uk

### Games

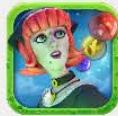

Bubble Witch

5.4 ECUs

[Details](#)

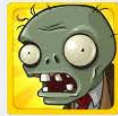

Plants versus Zombies

5.4 ECUs

[Details](#)

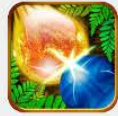

Zuma

5.4 ECUs

[Details](#)

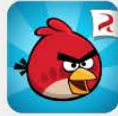

Angry Birds

5.4 ECUs

[Details](#)

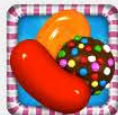

Candy crush

5.4 ECUs

[Details](#)

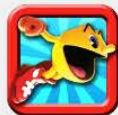

PAC-MAN DASH!

5.4 ECUs

[Details](#)

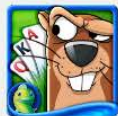

Fairway Solitarie

5.4 ECUs

[Details](#)

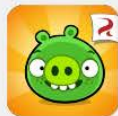

Bad piggies

5.4 ECUs

[Details](#)

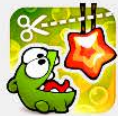

Cut the rope

5.4 ECUs

[Details](#)

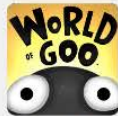

World of Goo

5.4 ECUs

[Details](#)

### Movies

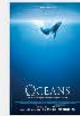

Oceans

5.4 ECUs

[Details](#)

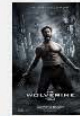

The Wolverine

5.4 ECUs

[Details](#)

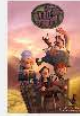

The Smoke Seller

5.4 ECUs

[Details](#)

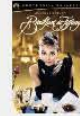

Breakfast at Tiffany's

5.4 ECUs

[Details](#)

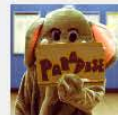

Coldplay - Paradise

5.4 ECUs

[Details](#)

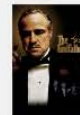

The Godfather

5.4 ECUs

[Details](#)

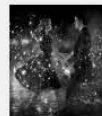

Nuit Blanche

5.4 ECUs

[Details](#)

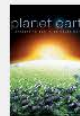

Planet Earth

5.4 ECUs

[Details](#)

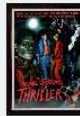

Thriller

5.4 ECUs

[Details](#)

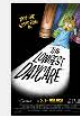

The Longest Daycare

5.4 ECUs

[Details](#)

- Categories →
- Movies
  - Games

Contact information →

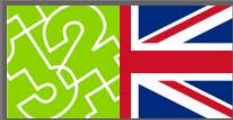

Lineex Shop  
10 South Molton Street,  
London, W1K 5QH  
United Kingdom  
+44 020 7499 8002  
info@lineexshop.co.uk

## Games

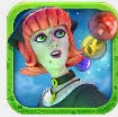

**Bubble Witch**

5.4 ECUs

[Details](#)

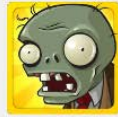

**Plants versus Zombies**

5.4 ECUs

[Details](#)

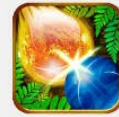

**Zuma**

5.4 ECUs

[Details](#)

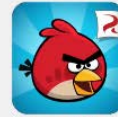

**Angry Birds**

5.4 ECUs

[Details](#)

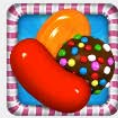

**Candy crush**

5.4 ECUs

[Details](#)

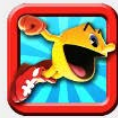

**PAC-MAN DASH!**

5.4 ECUs

[Details](#)

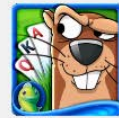

**Fairway Solitarie**

5.4 ECUs

[Details](#)

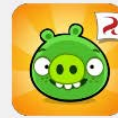

**Bad piggies**

5.4 ECUs

[Details](#)

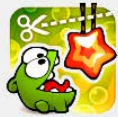

**Cut the rope**

5.4 ECUs

[Details](#)

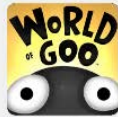

**World of Goo**

5.4 ECUs

[Details](#)

- Categories →
- Movies
- Games

Contact information →

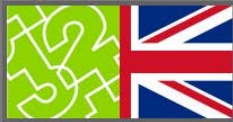

Lineex Shop  
10 South Molton Street,  
London, W1K 5QH  
United Kingdom  
+44 020 7499 8002  
info@lineexshop.co.uk

## Movies

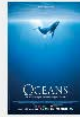

Oceans

5.4 ECUs

[Details](#)

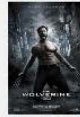

The Wolverine

5.4 ECUs

[Details](#)

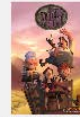

The Smoke Seller

5.4 ECUs

[Details](#)

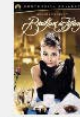

Breakfast at Tiffany's

5.4 ECUs

[Details](#)

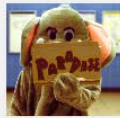

Coldplay - Paradise

5.4 ECUs

[Details](#)

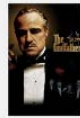

The Godfather

5.4 ECUs

[Details](#)

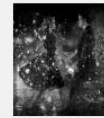

Nuit Blanche

5.4 ECUs

[Details](#)

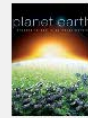

Planet Earth

5.4 ECUs

[Details](#)

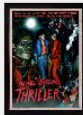

Thriller

5.4 ECUs

[Details](#)

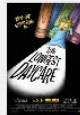

The Longest Daycare

5.4 ECUs

[Details](#)

- Categories →
- Movies
- Games

Contact information →

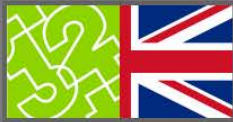

Lineex Shop  
10 South Molton Street,  
London, W1K 5QH  
United Kingdom  
+44 020 7499 8002  
info@lineexshop.co.uk

### Games

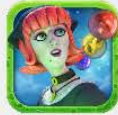

Bubble Witch

5.4 ECUs

[Details](#)

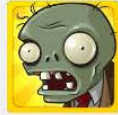

Plants versus Zombies

5.4 ECUs

[Details](#)

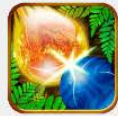

Zuma

5.4 ECUs

[Details](#)

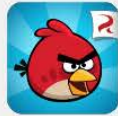

Angry Birds

5.4 ECUs

[Details](#)

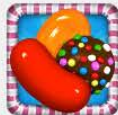

Candy crush

5.4 ECUs

[Details](#)

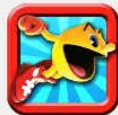

PAC-MAN DASH!

5.4 ECUs

[Details](#)

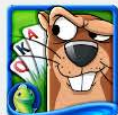

Fairway Solitarie

5.4 ECUs

[Details](#)

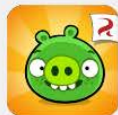

Bad piggies

5.4 ECUs

[Details](#)

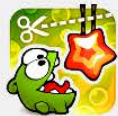

Cut the rope

5.4 ECUs

[Details](#)

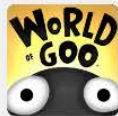

World of Goo

5.4 ECUs

[Details](#)

### Movies

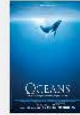

Oceans

5.4 ECUs

[Details](#)

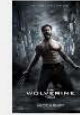

The Wolverine

5.4 ECUs

[Details](#)

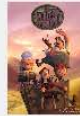

The Smoke Seller

5.4 ECUs

[Details](#)

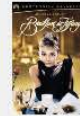

Breakfast at Tiffany's

5.4 ECUs

[Details](#)

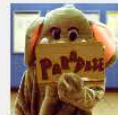

Coldplay - Paradise

5.4 ECUs

[Details](#)

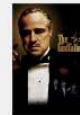

The Godfather

5.4 ECUs

[Details](#)

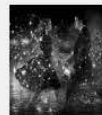

Nuit Blanche

5.4 ECUs

[Details](#)

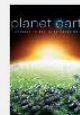

Planet Earth

5.4 ECUs

[Details](#)

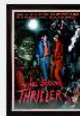

Thriller

5.4 ECUs

[Details](#)

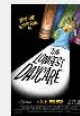

The Longest Daycare

5.4 ECUs

[Details](#)

Firefox | Lineex Shop | vlineex.uv.es/demos/ecommerce/shoppingcart.php?product=14

**-LINEEX- buyvip**

Home | Products | Contact | Terms & Conditions

Remaining Credit: 27 ECUs | Remaining Seconds: 191

Categories: Movies, Games

Contact information: Lineex Shop, 10 South Molton Street, London, W1K 5QH, United Kingdom, +44 020 7499 8002, info@lineexshop.co.uk

**Confirming my purchase**

You have to accept the immediate performance of the contract

Price: 5,4 ECUs

Total: 5,4 ECUs

I agree to the immediate performance of the contract and understand that I cannot withdraw from this purchase.  
 \*To avoid the disappointment please ensure the product you are purchasing is compatible with the devices or the systems you use and/or the region in which you are now.

Cancel | Buy

Home | Products | Contact | Terms & Conditions

**-LINEEX- buyvip**

Home | Products | Contact | Terms & Conditions

Remaining Credit: 21.6 ECUs | Remaining Seconds: 168

Categories: Movies, Games

Contact information: Lineex Shop, 10 South Molton Street, London, W1K 5QH, United Kingdom, +44 020 7499 8002, info@lineexshop.co.uk

**Confirming my purchase**

Your purchase has been carried out correctly.

Continue shopping

Home | Products | Contact | Terms & Conditions

Copyright © Lineex Shop | Designed by Lineex

Categories →

[Movies](#)  
[Games](#)

Contact information →

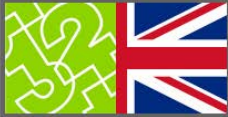

**Lineex Shop**  
10 South Molton Street,  
London, W1K 5QH  
United Kingdom  
+44 020 7499 8002  
info@lineexshop.co.uk

## Contact information

### Postal address

**Lineex Shop**  
10 South Molton Street,  
London, W1K 5QH  
United Kingdom  
+44 020 7499 8002  
info@lineexshop.co.uk

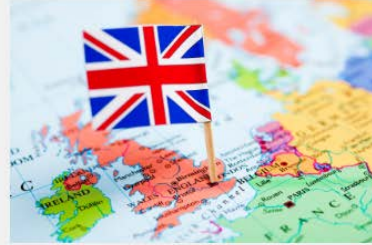

**Phone** +44 020 7499 8002  
**Email:** info@lineexshop.co.uk

- Categories →
- Movies
  - Games

Contact information →



**Lineex Shop**  
10 South Molton Street,  
London, W1K 5QH  
United Kingdom  
+44 020 7499 8002  
info@lineexshop.co.uk

## Candy crush

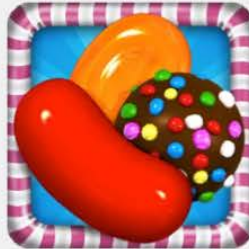

Price 5.4 ECUs

Genre Arcade

### Description

Welcome to the Candy Shop! Which one is your favorite? Crush candy to create special sweets such as striped candy, wrapped candy and rainbow candy. Combine these specials to create spectacular effects such as Super Stripe and Mega-Candy. The game can only be run on Windows. To play the game properly it is recommended to have a computer with some a minimum hardware requirements, such as 1 GB RAM, 256 MB graphics card, a 2.4 GHz processor and 500 MB or hard drive space.

### Preview

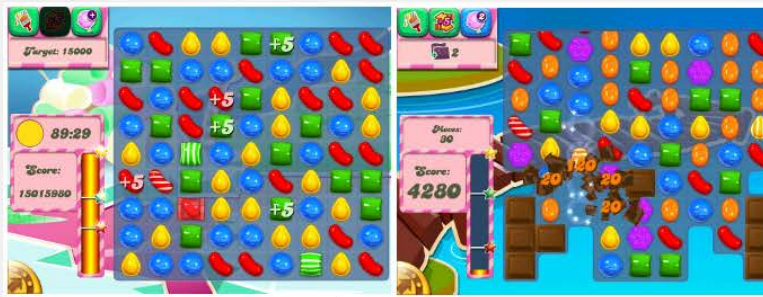

Compatible  Language Spanish Recommended Hardware 2.4GHz Processor 500MB HD space

[Back](#) [Go to Buy](#)

### Reviews

"Quite frankly, we didn't expect to fall in love with this game. Excellent stuff."

*Modojo*, 2012-11-18 

"Candy Crush Saga is as addictive as it is frustrating. The game starts off easy, but soon gets difficult and very challenging."

*XGN*, 2013-03-12 

### Users' comments

I started playing because a friend invited me to play. I started to play, and didn't realize how much time actually passed before I ran out of lives. I can't wait to play again.

*Rjreyes34*, 2012-11-10

I can't stop playing this game. It's so addictive and I just want to get through all the puzzles. However minus 2 points because the amount of money they charge for things is ridiculously expensive. I guess I just have to wait for friends to help me out.... Collapse.

*Wincew*, 2013-05-13

Categories →

[Movies](#)  
[Games](#)

Contact information →

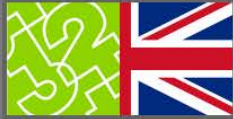

**Lineex Shop**  
10 South Molton Street,  
London, W1K 5QH  
United Kingdom  
+44 020 7499 8002  
info@lineexshop.co.uk

## Candy crush

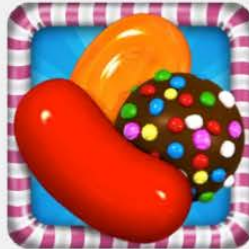

Price 5.4 ECUs

Genre Arcade

### Description

Welcome to the Candy Shop! Which one is your favorite? Crush candy to create special sweets such as striped candy, wrapped candy and rainbow candy. Combine these specials to create spectacular effects such as Super Stripe and Mega-Candy. The game can only be run on Windows. To play the game properly it is recommended to have a computer with some a minimum hardware requirements, such as 1 GB RAM, 256 MB graphics card, a 2.4 GHz processor and 500 MB or hard drive space.

### Preview

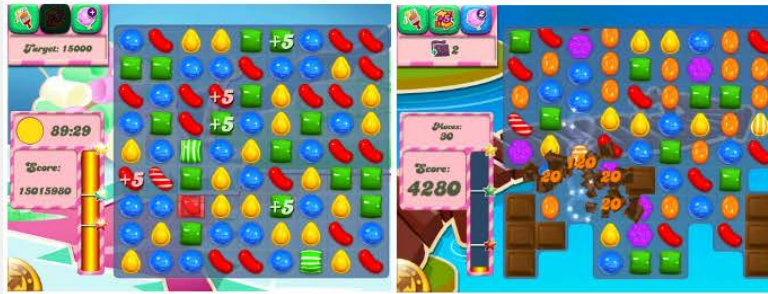

[Back](#)

[Go to Buy](#)

### Reviews

"Quite frankly, we didn't expect to fall in love with this game. Excellent stuff."

*Modojo*, 2012-11-18

"Candy Crush Saga is as addictive as it is frustrating. The game starts off easy, but soon gets difficult and very challenging."

*XGN*, 2013-03-12

### Users' comments

I started playing because a friend invited me to play. I started to play, and didn't realize how much time actually passed before I ran out of lives. I can't wait to play again.

*Rjreyes34*, 2012-11-10

I can't stop playing this game. It's so addictive and I just want to get through all the puzzles. However minus 2 points because the amount of money they charge for things is ridiculously expensive. I guess I just have to wait for friends to help me out.... Collapse.

*Wincew*, 2013-05-13



- Categories →
- Movies
  - Games

Contact information →



**Lineex Shop**  
10 South Molton Street,  
London, W1K 5QH  
United Kingdom  
+44 020 7499 8002  
info@lineexshop.co.uk

## Candy crush



Price 5.4 ECUs

Genre Arcade

### Description

Welcome to the Candy Shop! Which one is your favorite? Crush candy to create special sweets such as striped candy, wrapped candy and rainbow candy. Combine these specials to create spectacular effects such as Super Stripe and Mega-Candy. The game can only be run on Windows. To play the game properly it is recommended to have a computer with some a minimum hardware requirements, such as 1 GB RAM, 256 MB graphics card, a 2.4 GHz processor and 500 MB or hard drive space.

### Preview

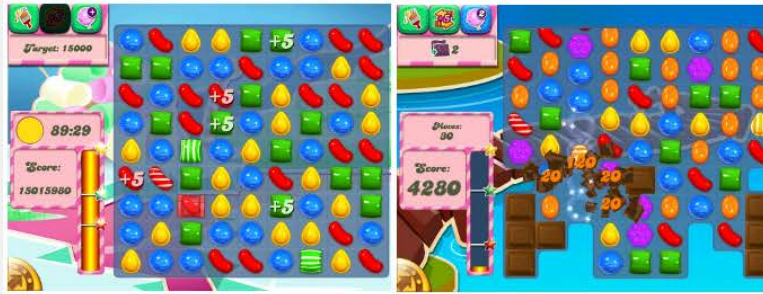

|            |         |          |         |                      |                                    |
|------------|---------|----------|---------|----------------------|------------------------------------|
| Compatible | Windows | Language | Spanish | Recommended Hardware | 2.4GHz Processor<br>500MB HD space |
|------------|---------|----------|---------|----------------------|------------------------------------|

[Back](#) [Go to Buy](#)

### Reviews

"Quite frankly, we didn't expect to fall in love with this game. Excellent stuff."

*Modojo*, 2012-11-18

"Candy Crush Saga is as addictive as it is frustrating. The game starts off easy, but soon gets difficult and very challenging."

*XGN*, 2013-03-12

### Users' comments

I started playing because a friend invited me to play. I started to play, and didn't realize how much time actually passed before I ran out of lives. I can't wait to play again.

*Rjreyes34*, 2012-11-10

I can't stop playing this game. It's so addictive and I just want to get through all the puzzles. However minus 2 points because the amount of money they charge for things is ridiculously expensive. I guess I just have to wait for friends to help me out.... Collapse.

*Wincew*, 2013-05-13

- Categories →
- Movies
  - Games

Contact information →



**Lineex Shop**  
10 South Molton Street,  
London, W1K 5QH  
United Kingdom  
+44 020 7499 8002  
info@lineexshop.co.uk

## The Wolverine

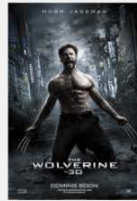

**Price** 3.6 ECUs

**Genre** Fantasy, Sci-Fi, Action | Superheroes. Based on Comic, Marvel Comics, Spin-off, Sequel

### Description

Summoned to Japan by an old acquaintance, Wolverine becomes embroiled in a conflict that forces him to confront his own demons. The movie was directed by James Mangold in 2013 and produced by Marvel Enterprises / Twentieth Century Fox Film Corporation (USA). The movie can only be watched in Europe and has a length of 148 seconds. To watch the movie properly it is recommended to have a computer with some a minimum hardware requirements, such as 1 GB RAM, 256 MB graphics card, a 2.4 GHz processor and 500 MB or hard drive space.

### Preview

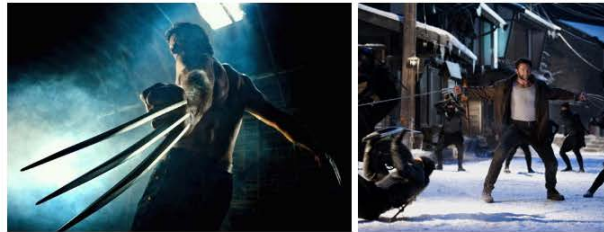

Compatible  Language Spanish Length 148 seconds

[Back](#)

[Go to Buy](#)

### Reviews

"In the glut of superhero movies hitting theaters, The Wolverine stands out for several reasons."

*Scott Nash, Three Movie Buffs, 2013-07-30* 

### Users' comments

Just as comic-book movie fatigue was starting to set in, along comes The Wolverine to revive a moribund summer of superheroes.

*Rene Rodriguez, 2013-07-26*

This film doesn't offer much in the way of excitement or suspense. Aside from a slightly unexpected plot development in the final minutes, it does things by the book.

*Matthew Toomey, 2013-07-29*

- Categories →
- Movies
  - Games

Contact information →

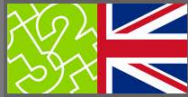

Lineex Shop  
10 South Molton Street,  
London, W1K 5QH  
United Kingdom  
+44 020 7499 8002  
info@lineexshop.co.uk

## The Wolverine

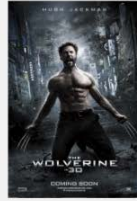

Price 3.6 ECUs

Genre Fantasy, Sci-Fi, Action | Superheroes. Based on Comic, Marvel Comics. Spin-off. Sequel

### Description

Summoned to Japan by an old acquaintance, Wolverine becomes embroiled in a conflict that forces him to confront his own demons. The movie was directed by James Mangold in 2013 and produced by Marvel Enterprises / Twentieth Century Fox Film Corporation (USA). The movie can only be watched in Europe and has a length of 148 seconds. To watch the movie properly it is recommended to have a computer with some a minimum hardware requirements, such as 1 GB RAM, 256 MB graphics card, a 2.4 GHz processor and 500 MB or hard drive space.

### Preview

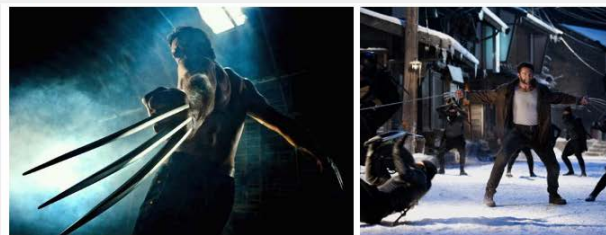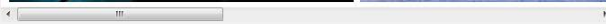

[Back](#)

[Go to Buy](#)

### Reviews

"In the glut of superhero movies hitting theaters, The Wolverine stands out for several reasons."

*Scott Nash, Three Movie Buffs, 2013-07-30* ⭐⭐⭐⭐

### Users' comments

Just as comic-book movie fatigue was starting to set in, along comes The Wolverine to revive a moribund summer of superheroes.

*Rene Rodriguez, 2013-07-26*

This film doesn't offer much in the way of excitement or suspense. Aside from a slightly unexpected plot development in the final minutes, it does things by the book.

*Matthew Toomey, 2013-07-29*

- Categories →
- Movies
  - Games

Contact information →

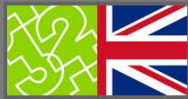

**Lineex Shop**  
10 South Molton Street,  
London, W1K 5QH  
United Kingdom  
+44 020 7499 8002  
info@lineexshop.co.uk

## The Wolverine

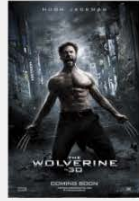

**Price** 3,6 ECUs

**Genre** Fantasy, Sci-Fi, Action | Superheroes. Based on Comic, Marvel Comics. Spin-off. Sequel

### Description

Summoned to Japan by an old acquaintance, Wolverine becomes embroiled in a conflict that forces him to confront his own demons. The movie was directed by James Mangold in 2013 and produced by Marvel Enterprises / Twentieth Century Fox Film Corporation (USA). The movie can only be watched in Europe and has a length of 148 seconds. To watch the movie properly it is recommended to have a computer with some a minimum hardware requirements, such as 1 GB RAM, 256 MB graphics card, a 2.4 GHz processor and 500 MB or hard drive space.

### Preview

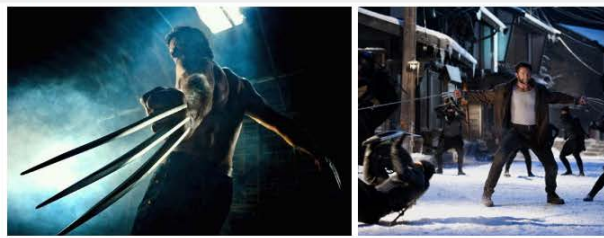

**Compatible** Europe      **Language** Spanish      **Length** 148 seconds

[Back](#)

[Go to Buy](#)

### Reviews

"In the glut of superhero movies hitting theaters, The Wolverine stands out for several reasons."

*Scott Nash, Three Movie Buffs, 2013-07-30* ★★★★★

### Users' comments

Just as comic-book movie fatigue was starting to set in, along comes The Wolverine to revive a moribund summer of superheroes.

*Rene Rodriguez, 2013-07-26*

This film doesn't offer much in the way of excitement or suspense. Aside from a slightly unexpected plot development in the final minutes, it does things by the book.

*Matthew Toomey, 2013-07-29*
